# Supplementary material for: Possible provenance of IRD by tracing late Eocene Antarctic iceberg melting using a high-resolution ocean model
Source: Copernicus journal article supplement (doi:10.5194/cp-21-441-2025), 2025-02-13
Supplement: Supplementary file 1 [file cp-21-441-2025-supplement.zip]

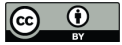

*Supplement of*

**Possible provenance of IRD by tracing late Eocene Antarctic iceberg melting using a high-resolution ocean model**

**Mark V. Elbertsen et al.**

*Correspondence to:* Mark V. Elbertsen (m.v.elbertsen@uu.nl)

- cp-21-441-2025-supplement-title-page.pdf
- EoceneIcebergTracingAnimation.mp4
- EoceneIcebergTracingSupplements\_v4.pdf

The copyright of individual parts of the supplement might differ from the article licence.
